# Supplementary material for: Structure-guided approach to modulate small molecule binding to a promiscuous ligand-activated protein
Source: PubMed Central journal article supplement — Proc Natl Acad Sci U S A. 2023 Feb 27;120(10):e2217804120. doi: 10.1073/pnas.2217804120 (PMC10013835; doi:10.1073/pnas.2217804120), 2023-02-27
Supplement: pnas.2217804120.sapp.pdf [file pnas.2217804120.sapp.pdf]

## Supporting Information for

### Structure-guided approach to modulate small molecule binding to a promiscuous ligand-activated protein

Wenwei Lin<sup>1,\*</sup>, Andrew D. Huber<sup>1,\*</sup>,<sup>†</sup>, Shyaron Poudel<sup>1</sup>, Yongtao Li<sup>1</sup>, Jayaraman Seetharaman<sup>2</sup>, Darcie J. Miller<sup>2</sup>, Taosheng Chen<sup>1</sup>,<sup>†</sup>

#### This PDF file includes:

Supporting Text  
Tables S1 to S4  
Figures S1 to S24  
SI References

## SUPPORTING TEXT

**Synthesis.** Organic reagents were purchased from commercial suppliers unless otherwise noted and were used without further purification. All solvents were analytical or reagent grade and the solvents were dried using the Glass Contour Solvent Systems by SG Water USA. All reactions with water- and/or air-sensitive starting materials were carried out in pre-dried glass wares under argon atmosphere with standard procedure. Flash column chromatography was performed by using Biotage Isolera™ Flash Systems and Biotage® SNAP Ultra or Biotage® SNAP Ultra C18 columns (Biotage, Charlotte, NC). All reactions as well as compound purity were monitored by UPLC-MS by using a Waters Acquity UPLC MS system with a C18 column in a 2-min gradient (H<sub>2</sub>O + 0.1% formic acid → acetonitrile + 0.1% formic acid) and detectors of PDA (215–400 nm), ELSD, and Acquity SQD ESI-positive MS (Waters Corporation, Milford, MA). High-resolution mass spectra were determined by using a Waters Acquity UPLC system with a C18 column (H<sub>2</sub>O + 0.1% formic acid → acetonitrile + 0.1% formic acid gradient over 2.5 min) and Xevo G2Q-TOF ESI-positive MS in resolution mode. Compounds were internally normalized to leucine-enkephalin lock solution, with a calculated error of <3 ppm. All final compounds used for SAR studies have purity at 95% or greater. All NMR spectra were recorded on a Bruker 500 MHz spectrometer (Bruker Corporation) in the solvents indicated and spectra were processed using MestReNova (14.1.0) (Mestrelab Research). The chemical shift values are expressed in parts per million (ppm) relative to tetramethylsilane as the internal standard. Coupling constants (*J*) are reported in hertz (Hz). **T0-C4**, **T0-C5**, **T0-C6**, **T0-C8**, and **T0-BP** are also known as **SJPYT-302**, **SJPYT-315**, **SJPYT-316**, **SJPYT-317** and **SJPYT-319**, respectively; this nomenclature is used in the following methods.

Synthesis of the analogs (**SJPYT-302**, **315-317** and **319**) is described in Figure S5 under the conditions described by B. P. Fauber et al. (1). Treatment of 2-(4-Aminophenyl)-1,1,1,3,3,3-hexafluoropropan-2-ol (**1a**) with benzenesulfonyl chloride in the presence of 2,6-Lutidine gave *N*-[4-(1,1,1,3,3,3-Hexafluoro-2-hydroxypropan-2-yl)phenyl]benzenesulfonamide (**1b**). The secondary aniline (**1b**) was then alkylated with respective alkyl-halides in the presence of potassium carbonate and heating to produce the target *N*-alkyl analogs **SJPYT-302**, **315-317** and **319**.

***N*-[4-(1,1,1,3,3,3-hexafluoro-2-hydroxypropan-2-yl)phenyl]benzenesulfonamide (1b).** To a solution of 2-(4-aminophenyl)-1,1,1,3,3,3-hexafluoropropan-2-ol (**1a**, 5g, 19.29 mmol) in acetone (30 mL) at room temperature, benzenesulfonyl chloride (2.59 ml, 20.26 mmol) and 2,6-dimethylpyridine (4.13 g, 38.6 mmol) was added. The mixture was allowed to stir at 60 °C for overnight. After the complete consumption of the substituted aniline, the reaction mixture was concentrated, and water (100 mL) was added. The aqueous layer was extracted with EtOAc (100 mL × 2). The combined organic layer was washed with brine. The organic layer was then dried over MgSO<sub>4</sub>, filtered, and concentrated under reduced pressure. The obtained residue was purified by silica gel chromatography (0% to 100% acetonitrile in water) to give *N*-[4-(1,1,1,3,3,3-hexafluoro-2-hydroxypropan-2-yl)phenyl]benzenesulfonamide (**1b**, 6.78 g, 88% yield) as an off-white solid. <sup>1</sup>H NMR (500 MHz, DMSO-*d*<sub>6</sub>) δ 11.21 (s, 1H), 9.10 (s, 1H), 8.45 – 8.24 (m, 2H), 8.18 – 8.12 (m, 1H), 8.11 – 8.00 (m, 4H), 7.81 – 7.67 (m, 2H).

***N*-butyl-*N*-[4-(1,1,1,3,3,3-hexafluoro-2-hydroxypropan-2-yl)phenyl]benzenesulfonamide (SJPYT-302, T0-C4).** A solution of *N*-[4-(1,1,1,3,3,3-hexafluoro-2-hydroxypropan-2-yl)phenyl]benzenesulfonamide (**1b**, 200 mg, 0.501 mmol) in CH<sub>3</sub>CN 5 mL at rt was mixed with K<sub>2</sub>CO<sub>3</sub> (138 mg, 1.002 mmol) and 1-iodobutane (62.7 μl, 0.551 mmol). The suspension was stirred at 70 °C for overnight. The reaction mixture was then added to water (50 mL) and extracted with EtOAc (50 mL × 2). The EtOAc layer was washed with water, dried with anhydrous Na<sub>2</sub>SO<sub>4</sub>, and concentrated under reduced pressure. The residue was purified by silica gel chromatography (0% to 100% EA in hexane) to give the product **SJPYT-302** (155.2 mg, 68% yield, 96.78% purity) as a white solid. <sup>1</sup>H NMR (500 MHz, DMSO-*d*<sub>6</sub>) δ 8.80 (s, 1H), 7.74 – 7.68 (m, 1H), 7.66 (d, *J* = 8.4 Hz, 2H), 7.62 – 7.53 (m, 4H), 7.29 – 7.22 (m, 2H), 3.70 – 3.41 (m, 2H), 1.53 – 1.09 (m, 4H), 0.84 – 0.76 (m, 3H). <sup>13</sup>C NMR (126 MHz, DMSO-*d*<sub>6</sub>) δ 140.83, 138.05, 133.73, 130.29, 129.82, 128.68, 128.07, 127.58, 126.73, 124.43, 122.14, 119.84, 77.38, 77.15, 76.91, 76.68, 49.60, 30.15, 19.31, 13.80. ESI-TOF HRMS: *m/z* 456.1081 (C<sub>19</sub>H<sub>19</sub>F<sub>6</sub>NO<sub>3</sub>S + H<sup>+</sup> requires 456.1063).

***N*-[4-(1,1,1,3,3,3-hexafluoro-2-hydroxypropan-2-yl)phenyl]-*N*-pentylbenzenesulfonamide (SJPYT-315, T0-C5).** The title compound was synthesized using a similar procedure as described for **SJPYT-302** by employing **1b** and 1-iodopentane to give a white solid (199.7 mg, 85% yield, 100% purity). <sup>1</sup>H NMR (500

MHz, DMSO- $d_6$ )  $\delta$  8.80 (s, 1H), 7.74 – 7.64 (m, 3H), 7.62 – 7.55 (m, 4H), 7.29 – 7.22 (m, 2H), 3.56 (t,  $J$  = 6.8 Hz, 2H), 1.37 – 1.14 (m, 6H), 0.77 (t,  $J$  = 6.9 Hz, 3H).  $^{13}\text{C}$  NMR (126 MHz, DMSO- $d_6$ )  $\delta$  139.78, 137.03, 132.66, 129.23, 128.76, 127.63, 127.00, 126.52, 125.67, 123.37, 121.08, 118.78, 76.55, 76.32, 76.09, 75.85, 75.62, 48.82, 30.10, 27.18, 26.64, 20.85, 13.14. ESI-TOF HRMS:  $m/z$  470.1233 ( $\text{C}_{20}\text{H}_{21}\text{F}_6\text{NO}_3\text{S} + \text{H}^+$  requires 470.1219).

***N*-(4-(1,1,1,3,3,3-hexafluoro-2-hydroxypropan-2-yl)phenyl)-*N*-hexylbenzenesulfonamide (SJPYT-316, T0-C6).** The title compound was synthesized using a similar procedure as described for **SJPYT-302** by employing **1b** and 1-bromohexane to give a white solid (171.9 mg, 71% yield, 97.63% purity).  $^1\text{H}$  NMR (500 MHz, DMSO- $d_6$ )  $\delta$  8.80 (s, 1H), 7.74 – 7.62 (m, 3H), 7.61 – 7.53 (m, 4H), 7.28 – 7.23 (m, 2H), 3.56 (t,  $J$  = 6.7 Hz, 2H), 1.34 – 1.09 (m, 8H), 0.79 (t,  $J$  = 6.9 Hz, 3H).  $^{13}\text{C}$  NMR (126 MHz, DMSO- $d_6$ )  $\delta$  139.80, 137.04, 132.66, 129.23, 128.76, 127.63, 127.00, 126.53, 125.68, 123.38, 121.09, 118.79, 76.56, 76.33, 76.10, 75.86, 75.63, 48.83, 30.10, 29.93, 26.95, 24.64, 21.30, 13.16. ESI-TOF HRMS:  $m/z$  484.1387 ( $\text{C}_{21}\text{H}_{23}\text{F}_6\text{NO}_3\text{S} + \text{H}^+$  requires 484.1376).

***N*-(4-(1,1,1,3,3,3-hexafluoro-2-hydroxypropan-2-yl)phenyl)-*N*-octylbenzenesulfonamide (SJPYT-317, T0-C8).** The title compound was synthesized using a similar procedure as described for **SJPYT-302** by employing **1b** and 1-iodooctane to give a white solid (63.4 mg, 64% yield, 99.05% purity).  $^1\text{H}$  NMR (500 MHz, DMSO- $d_6$ )  $\delta$  8.80 (s, 1H), 7.73 – 7.62 (m, 3H), 7.62 – 7.53 (m, 4H), 7.28 – 7.22 (m, 2H), 3.56 (t,  $J$  = 6.7 Hz, 2H), 1.32 – 1.12 (m, 12H), 0.82 (t,  $J$  = 7.1 Hz, 3H).  $^{13}\text{C}$  NMR (126 MHz, DMSO- $d_6$ )  $\delta$  139.79, 137.04, 132.66, 129.23, 128.76, 127.62, 127.00, 126.54, 125.68, 123.39, 121.09, 118.79, 76.56, 76.33, 76.09, 75.86, 75.63, 48.82, 30.49, 27.86, 27.65, 26.93, 24.95, 21.43, 13.29. ESI-TOF HRMS:  $m/z$  512.1705 ( $\text{C}_{23}\text{H}_{27}\text{F}_6\text{NO}_3\text{S} + \text{H}^+$  requires 512.1689).

***N*-([1,1'-biphenyl]-4-ylmethyl)-*N*-(4-(1,1,1,3,3,3-hexafluoro-2-hydroxypropan-2-yl)phenyl)benzenesulfonamide (SJPYT-319, T0-BP).** The title compound was synthesized using a similar procedure as described for **SJPYT-302** by employing **1b** and 4-(bromomethyl)-1,1'-biphenyl to give a white solid (228.5 mg, 81% yield, 99.5% purity).  $^1\text{H}$  NMR (500 MHz, DMSO- $d_6$ )  $\delta$  8.74 (s, 1H), 7.79 – 7.71 (m, 1H), 7.70 – 7.54 (m, 10H), 7.43 (dd,  $J$  = 8.4, 7.1 Hz, 2H), 7.39 – 7.28 (m, 5H), 4.91 (s, 2H).  $^{13}\text{C}$  NMR (126 MHz, DMSO- $d_6$ )  $\delta$  139.84, 138.92, 138.67, 137.08, 134.74, 132.89, 129.01, 128.90, 128.31, 127.82, 127.30, 126.88, 126.86, 126.61, 126.07, 125.96, 125.59, 123.30, 121.00, 118.71, 76.47, 76.24, 76.01, 75.77, 75.54, 52.15. ESI-TOF HRMS:  $m/z$  564.1082 ( $\text{C}_{28}\text{H}_{21}\text{F}_6\text{NO}_3\text{S} - \text{H}^+$  requires 564.1074).

| Number | PDB ID | PubMed ID | Release Date | Ligand(s)                                                                                              |
|--------|--------|-----------|--------------|--------------------------------------------------------------------------------------------------------|
| 1      | 1ILG   | 11408620  | 6/27/2001    | No Ligand                                                                                              |
| 2      | 1ILH   | 11408620  | 6/27/2001    | 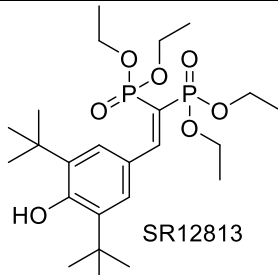 <p>SR12813</p>      |
| 3      | 1M13   | 12578355  | 3/4/2003     |  <p>Hyperforin</p>   |
| 4      | 1NRL   | 12909012  | 8/19/2003    |  <p>SR12813</p>     |
| 5      | 1SKX   | 15705662  | 3/8/2005     |  <p>Rifampicin</p> |
| 6      | 2O9I   | 17215127  | 1/30/2007    |  <p>T0901317</p>   |

|    |      |          |           |                                                                                                                                                                                                                             |
|----|------|----------|-----------|-----------------------------------------------------------------------------------------------------------------------------------------------------------------------------------------------------------------------------|
| 7  | 2QNV | 18768384 | 7/29/2008 | 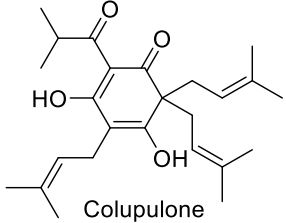 <p>Colupulone</p>                                                                                                                        |
| 8  | 3CTB | 18456871 | 12/2/2008 | No Ligand                                                                                                                                                                                                                   |
| 9  | 3HVL | 18456871 | 8/4/2009  |  <p>SR12813</p>                                                                                                                           |
| 10 | 3R8D | 21805522 | 8/17/2011 |  <p>PNU-142721</p>                                                                                                                        |
| 11 | 4J5W | 23602807 | 8/21/2013 | No Ligand                                                                                                                                                                                                                   |
| 12 | 4J5X | 23602807 | 8/21/2013 |  <p>SR12813</p>                                                                                                                          |
| 13 | 4NY9 | 25101488 | 8/27/2014 |  <p>N-((2R)-1-[(4S)-4-(4-chlorophenyl)-4-hydroxy-3,3-dimethylpiperidin-1-yl]-3-methyl-1-oxobutan-2-yl)-3-hydroxy-3-methylbutanamide</p> |
| 14 | 4XHD | 25579995 | 1/28/2015 |  <p>N-((2R)-1-[(4S)-4-(4-chlorophenyl)-4-hydroxy-3,3-dimethylpiperidin-1-yl]-3-methyl-1-oxobutan-2-yl)-2-cyclopropylacetamide</p>       |

|    |      |          |            |                                                                                                                                                                                                                                                              |
|----|------|----------|------------|--------------------------------------------------------------------------------------------------------------------------------------------------------------------------------------------------------------------------------------------------------------|
| 15 | 4S0T | 25579995 | 2/4/2015   | 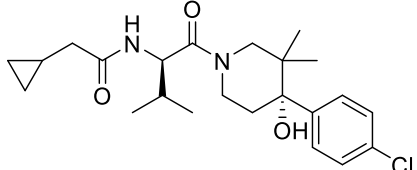 <p>N-((2R)-1-[(4S)-4-(4-chlorophenyl)-4-hydroxy-3,3-dimethylpiperidin-1-yl]-3-methyl-1-oxobutan-2-yl)-2-cyclopropylacetamide</p>                                          |
| 16 | 4S0S | 25579995 | 2/11/2015  | No Ligand                                                                                                                                                                                                                                                    |
| 17 | 4X1F | 26333997 | 9/9/2015   |  <p>17α-ethinylestradiol</p>                                                                                                                                               |
| 18 | 4X1G | 26333997 | 9/9/2015   |  <p>17α-ethinylestradiol      <i>trans</i>-nonachlor</p>                                                                                                                   |
| 19 | 4XAO | 26333997 | 9/9/2015   | No Ligand                                                                                                                                                                                                                                                    |
| 20 | 5A86 | 26291341 | 10/21/2015 |  <p>4-chloro-N-[(1R)-1-[1-ethyl-6-(trifluoromethyl)benzimidazol-2-yl]ethyl]benzenesulfonamide</p>                                                                         |
| 21 | 5X0R | 28963450 | 10/4/2017  |  <p>SJB7</p>                                                                                                                                                             |
| 22 | 6BNS | 29233651 | 12/20/2017 |  <p>2-[(2S)-4-[(4-fluorophenyl)sulfonyl]-7-(1,1,1,3,3,3-hexafluoro-2-hydroxypropan-2-yl)-3,4-dihydro-2H-1,4-benzothiazin-2-yl]-N-(2-hydroxy-2-methylpropyl)acetamide</p> |

|    |      |          |           |                                                                                                                                                                                                           |
|----|------|----------|-----------|-----------------------------------------------------------------------------------------------------------------------------------------------------------------------------------------------------------|
| 23 | 6DUP | 30146095 | 8/29/2018 | 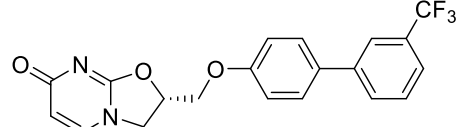 <p>(2S)-2-((3'-(trifluoromethyl)[1,1'-biphenyl]-4-yl)oxy)methyl)-2,3-dihydro-7H-[1,3]oxazolo[3,2-a]pyrimidin-7-one</p> |
| 24 | 6S41 | 31525968 | 10/2/2019 |  <p>XPC-7455</p>                                                                                                        |
| 25 | 6HTY | 31746599 | 12/4/2019 |  <p>(2-{R})-N-[4-(3-chloranylphenoxy)-3-sulfamoyl-phenyl]-2-phenyl-propanamide</p>                                      |
| 26 | 6NX1 | 30891142 | 2/12/2020 |  <p>1,1,1,3,3,3-hexafluoro-2-(4-{1-[4-fluorophenyl]sulfonyl}cyclopentyl}phenyl)propan-2-ol</p>                         |
| 27 | 6HJ2 | 34958586 | 3/25/2020 |  <p>Dabrafenib</p>                                                                                                    |
| 28 | 6P2B | 32160459 | 4/1/2020  |  <p>Garcinoic acid</p>                                                                                                |

|    |      |          |            |                                                                                                                                                                                                                              |
|----|------|----------|------------|------------------------------------------------------------------------------------------------------------------------------------------------------------------------------------------------------------------------------|
| 29 | 6XP9 | 32890685 | 9/23/2020  | 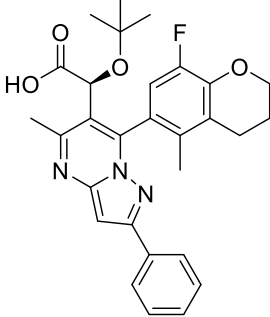 <p>(2S)-tert-butoxy[7-(8-fluoro-5-methyl-3,4-dihydro-2H-1-benzopyran-6-yl)-5-methyl-2-phenylpyrazolo[1,5-a]pyrimidin-6-yl]acetic acid</p> |
| 30 | 6TFI | 33108181 | 11/11/2020 |  <p>[2-[(3-chlorophenyl)methylamino]-7-methoxy-1,3-benzoxazol-5-yl]-(2,2-dimethylmorpholin-4-yl)methanone</p>                              |
| 31 | 7AX8 | 33361153 | 1/13/2021  | No Ligand                                                                                                                                                                                                                    |
| 32 | 7AX9 | 33361153 | 1/13/2021  |  <p><i>cis</i>-chlordane</p>                                                                                                              |
| 33 | 7AXA | 33361153 | 1/13/2021  |  <p>Clotrimazole</p>                                                                                                                     |
| 34 | 7AXB | 33361153 | 1/13/2021  |  <p>Endosulfan</p>                                                                                                                       |
| 35 | 7AXC | 33361153 | 1/13/2021  |  <p>Ferutinine</p>                                                                                                                       |



|    |      |          |           |                                                                                                                                                       |
|----|------|----------|-----------|-------------------------------------------------------------------------------------------------------------------------------------------------------|
| 36 | 7AXD | 33361153 | 1/13/2021 | 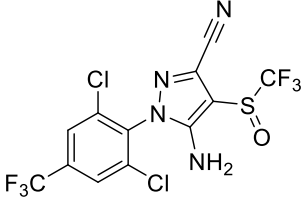 <p>Fipronil</p>                                                    |
| 37 | 7AXE | 33361153 | 1/13/2021 |  <p>Oxadiazon</p>                                                   |
| 38 | 7AXF | 33361153 | 1/13/2021 |  <p>Pretilachlor</p>                                                |
| 39 | 7AXG | 33361153 | 1/13/2021 |  <p>Tributyltin</p>                                                 |
| 40 | 7AXH | 33361153 | 1/13/2021 |  <p><math>\alpha</math>-zearalanol</p>                             |
| 41 | 7AXI | 33361153 | 1/13/2021 |  <p>17<math>\alpha</math>-ethinylestradiol      cis-chlordane</p> |
| 42 | 7AXJ | 33361153 | 1/13/2021 |  <p>17<math>\alpha</math>-ethinylestradiol      Clotrimazole</p>  |
| 43 | 7AXK | 33361153 | 1/13/2021 |  <p>17<math>\alpha</math>-ethinylestradiol      Endosulfan</p>    |

|    |      |          |           |                                                                                                                                                                                                                                   |
|----|------|----------|-----------|-----------------------------------------------------------------------------------------------------------------------------------------------------------------------------------------------------------------------------------|
| 44 | 7AXL | 33361153 | 1/13/2021 | 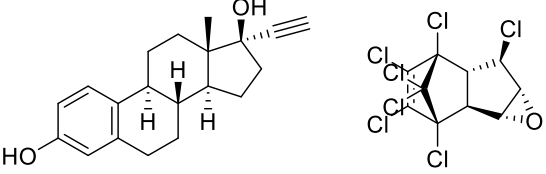 <p>17α-ethinylestradiol      Heptachlor endo-epoxide</p>                                                                                       |
| 45 | 7CHG |          | 7/7/2021  |  <p>Nomilin</p>                                                                                                                                 |
| 46 | 7N2A | 34531948 | 8/25/2021 |  <p>5-benzyl-2-(3-fluoro-2-hydroxyphenyl)-6-methyl-3-(2-phenylethyl)pyrimidin-4(3H)-one</p>                                                     |
| 47 | 7RIO | 34531948 | 8/25/2021 |  <p>N-[3-(2-tert-butyl-5-{2-[2-(methanesulfonyl)ethyl]pyrimidin-4-yl}-1,3-thiazol-4-yl)-2-fluorophenyl]-2,5-difluorobenzene-1-sulfonamide</p> |
| 48 | 7RIU | 34531948 | 8/25/2021 |  <p>N-{3-[5-(2-aminopyrimidin-4-yl)-2-tert-butyl-1,3-thiazol-4-yl]-2-fluorophenyl}thiophene-3-sulfonamide</p>                                 |

|    |      |          |           |                                                                                                      |
|----|------|----------|-----------|------------------------------------------------------------------------------------------------------|
| 49 | 7RIV | 34531948 | 8/25/2021 | 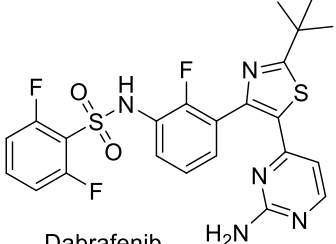 <p>Dabrafenib</p> |
|----|------|----------|-----------|------------------------------------------------------------------------------------------------------|

**Table S1. List of PXR LBD structures deposited in the PDB.**

| Data Collection                      |                                          |
|--------------------------------------|------------------------------------------|
| Resolution range (Å)                 | 32.49-2.25 (2.37-2.25)                   |
| Space group                          | <i>P</i> 4 <sub>3</sub> 2 <sub>1</sub> 2 |
| Unit cell dimensions                 |                                          |
| a, b, c (Å)                          | 91.89, 91.89, 85.99                      |
| α, β, γ (°)                          | 90.0, 90.0, 90.0                         |
| Wavelength (Å)                       | 0.97934                                  |
| Unique reflections                   | 18018                                    |
| Redundancy                           | 15.9 (11.2)                              |
| Completeness (%)                     | 100.0 (100.0)                            |
| I/σI                                 | 21.6 (1.5)                               |
| R <sub>sym</sub>                     | 0.091 (0.784)                            |
| CC <sub>1/2</sub>                    | 1.000 (0.895)                            |
| Model Refinement                     |                                          |
| R <sub>work</sub> /R <sub>free</sub> | 0.208/0.235                              |
| Number of atoms                      |                                          |
| Protein                              | 2196                                     |
| Ligand                               | 50                                       |
| Water                                | 111                                      |
| RMSD                                 |                                          |
| Bond length (Å)                      | 0.005                                    |
| Bond angles (°)                      | 0.8                                      |
| Ramachandran plot (%)                |                                          |
| Preferred                            | 98.15                                    |
| Outliers                             | 0.37                                     |
| Clash score <sup>a</sup>             | 0.68                                     |
| MolProbity score <sup>a</sup>        | 0.72                                     |
| Average B-factor (Å <sup>2</sup> )   | 49.0                                     |

**Table S2. Data collection and model refinement statistics for the rifamycin S-bound PXR LBD structure (PDB code 8E3N).** Values from the highest resolution shell are shown in parentheses.

<sup>a</sup>Generated with MolProbity.

| Data Collection                    |                        |
|------------------------------------|------------------------|
| Resolution range (Å)               | 36.76-2.30 (2.38-2.30) |
| Space group                        | $P 4_3 2_1 2$          |
| Unit cell dimensions               |                        |
| a, b, c (Å)                        | 91.10, 91.10, 85.21    |
| $\alpha$ , $\beta$ , $\gamma$ (°)  | 90.0, 90.0, 90.0       |
| Wavelength (Å)                     | 0.9201                 |
| Unique reflections                 | 16633                  |
| Redundancy                         | 14.7 (15.2)            |
| Completeness (%)                   | 99.9 (99.7)            |
| $I/\sigma$                         | 14.7 (2.3)             |
| $R_{\text{sym}}$                   | 0.114 (1.300)          |
| $CC_{1/2}$                         | 0.999 (0.815)          |
| Model Refinement                   |                        |
| $R_{\text{work}}/R_{\text{free}}$  | 0.217/0.239            |
| Number of atoms                    |                        |
| Protein                            | 2141                   |
| Ligand                             | 39                     |
| Water                              | 33                     |
| RMSD                               |                        |
| Bond length (Å)                    | 0.006                  |
| Bond angles (°)                    | 0.938                  |
| Ramachandran plot (%)              |                        |
| Preferred                          | 97.79                  |
| Outliers                           | 0.00                   |
| Clash score <sup>a</sup>           | 0.94                   |
| MolProbity score <sup>a</sup>      | 1.03                   |
| Average B-factor (Å <sup>2</sup> ) | 55.0                   |

**Table S3. Data collection and model refinement statistics for the T0-BP-bound PXR LBD structure (PDB code 8FPE).** Values from the highest resolution shell are shown in parentheses. <sup>a</sup>Generated with MolProbity.

| Data Collection                      |                                                       |
|--------------------------------------|-------------------------------------------------------|
| Resolution range (Å)                 | 29.67-2.37 (2.43-2.37)                                |
| Space group                          | <i>P</i> 2 <sub>1</sub> 2 <sub>1</sub> 2 <sub>1</sub> |
| Unit cell dimensions                 |                                                       |
| a, b, c (Å)                          | 85.37, 89.00, 105.57                                  |
| α, β, γ (°)                          | 90.0, 90.0, 90.0                                      |
| Wavelength (Å)                       | 0.9201                                                |
| Unique reflections                   | 33262                                                 |
| Redundancy                           | 6.8 (6.5)                                             |
| Completeness (%)                     | 99.4 (93.1)                                           |
| I/σI                                 | 13.4 (2.1)                                            |
| R <sub>sym</sub>                     | 0.081 (0.758)                                         |
| CC <sub>1/2</sub>                    | 0.998 (0.749)                                         |
| Model Refinement                     |                                                       |
| R <sub>work</sub> /R <sub>free</sub> | 0.204/0.228                                           |
| Number of atoms                      |                                                       |
| Protein                              | 4773                                                  |
| Ligand                               | 64                                                    |
| Water                                | 68                                                    |
| RMSD                                 |                                                       |
| Bond length (Å)                      | 0.009                                                 |
| Bond angles (°)                      | 1.158                                                 |
| Ramachandran plot (%)                |                                                       |
| Preferred                            | 96.14                                                 |
| Outliers                             | 0.18                                                  |
| Clash score <sup>a</sup>             | 0.87                                                  |
| MolProbity score <sup>a</sup>        | 1.42                                                  |
| Average B-factor (Å <sup>2</sup> )   | 60.0                                                  |

**Table S4. Data collection and model refinement statistics for the T0-C6-bound PXR LBD-SRC-1 structure (PDB code 8EQZ).** Values from the highest resolution shell are shown in parentheses.

<sup>a</sup>Generated with MolProbity.

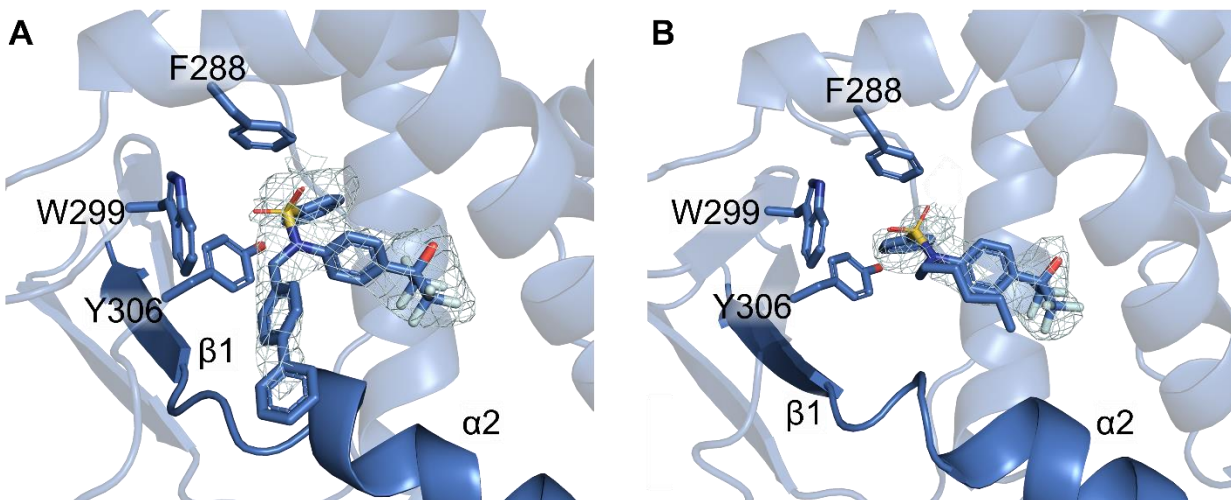

**Figure S1. Electron density for (A) T0-BP and (B) T0-C6 in the PXR LBD.** The 2Fo–Fc maps are contoured in mesh at 1.0 standard deviations and carved around ligands at 2 Å.

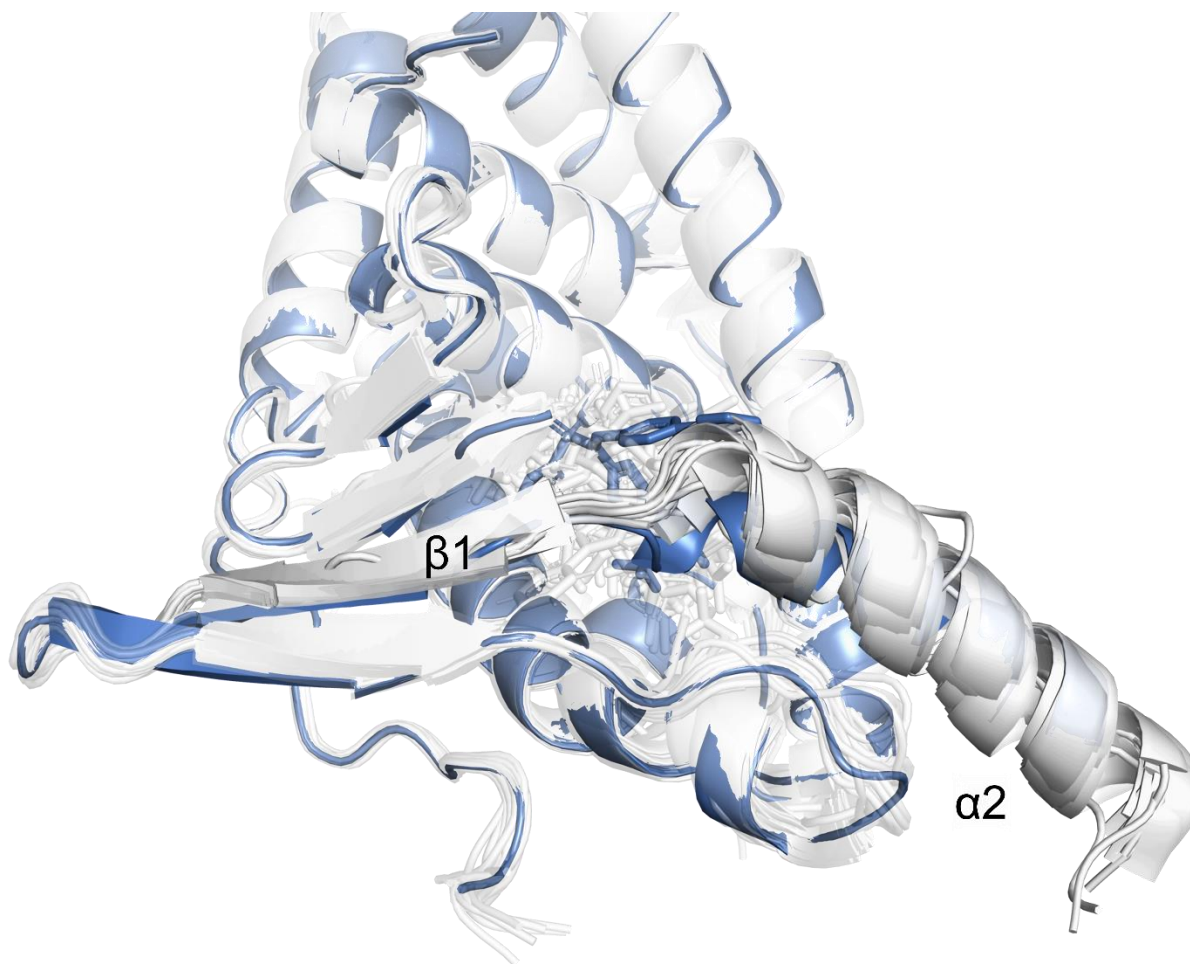

**Figure S2. T0-BP significantly displaces  $\alpha 2$ - $\beta 1$ .** All previously reported PXR LBD structures are overlaid with the T0-BP-bound structure colored in marine. Ligands are shown as sticks, and protein is represented as cartoon. The T0-BP structure overlays well with all other PXR LBD structures, but there is clear displacement of  $\alpha 2$  and  $\beta 1$ .



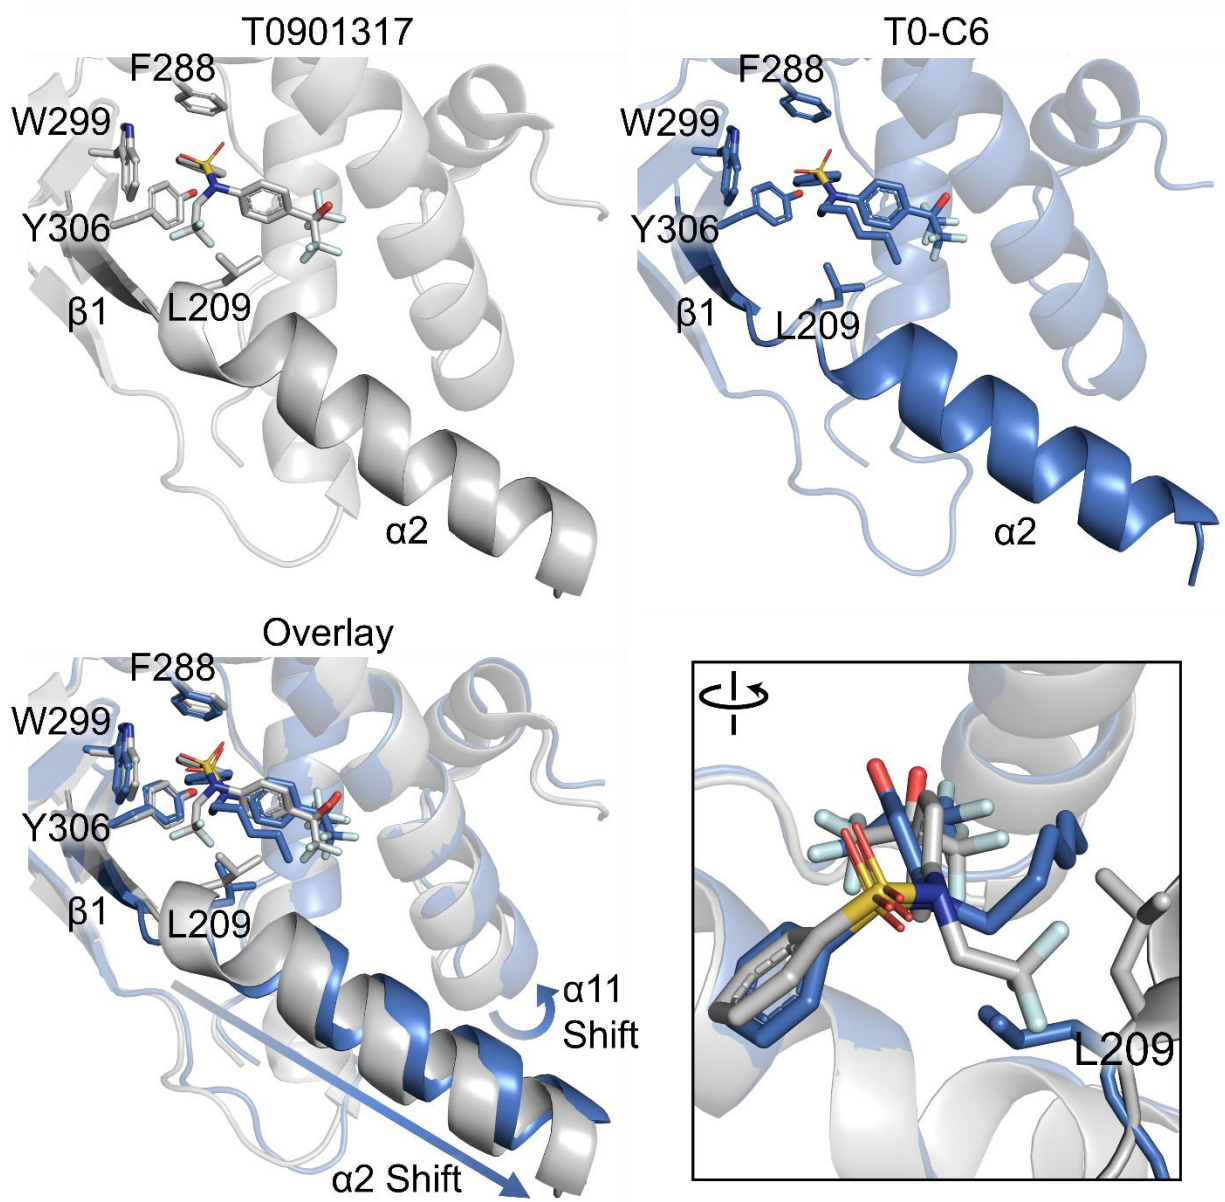

**Figure S3. Comparison of T0901317-bound (PDB ID 209I, chain A) and T0-C6-bound PXR LBD (chain A).** Panel 3 (Overlay) indicates the shifted  $\alpha 2$  and  $\alpha 1$ , and panel 4 (highlighted with a box) is zoomed in to show the L209 flip.

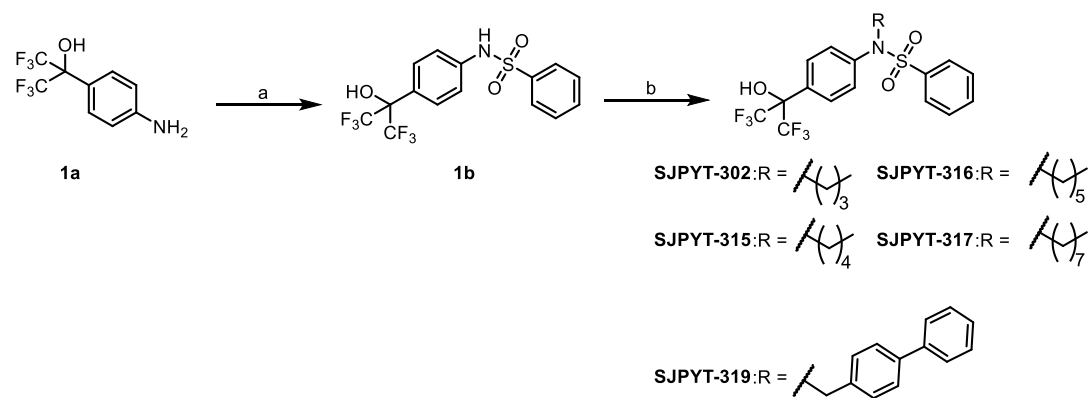

**Figure S4. Synthesis of SJPYT-302, SJPYT-315, SJPYT-316, SJPYT-317 and SJPYT-319.** Reagents and conditions: (a) Benzenesulfonyl chloride, 2,6-lutidine, acetone, reflux; (b) BrR or IR,  $\text{K}_2\text{CO}_3$ ,  $\text{CH}_3\text{CN}$ ,  $70^\circ\text{C}$ .

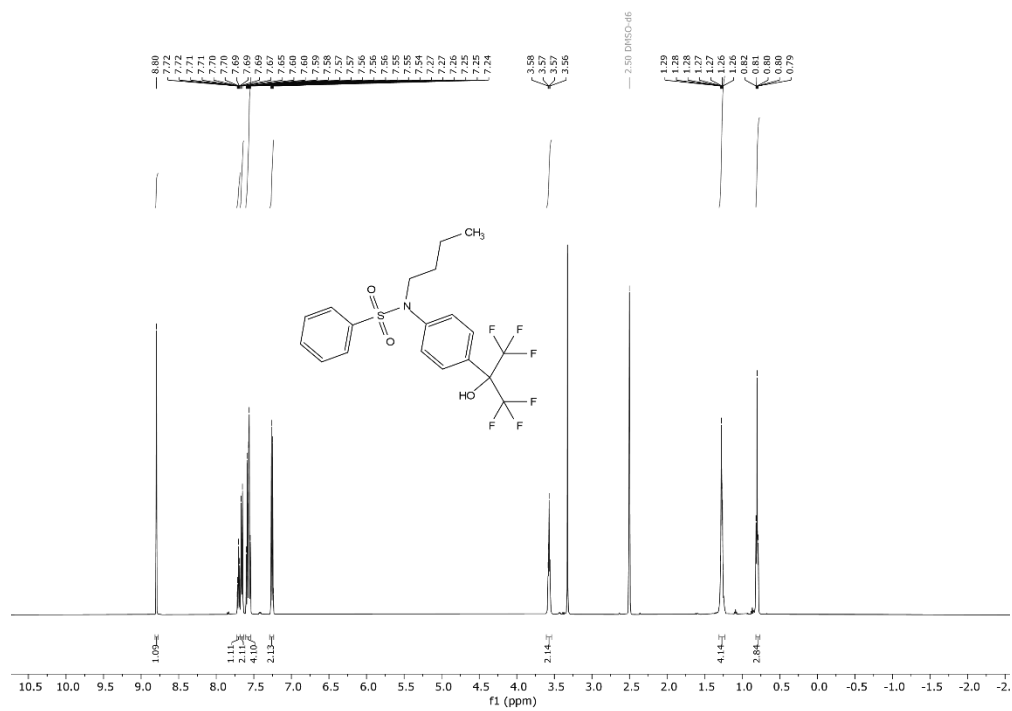

Figure S5. <sup>1</sup>H NMR of SJPYT-302.

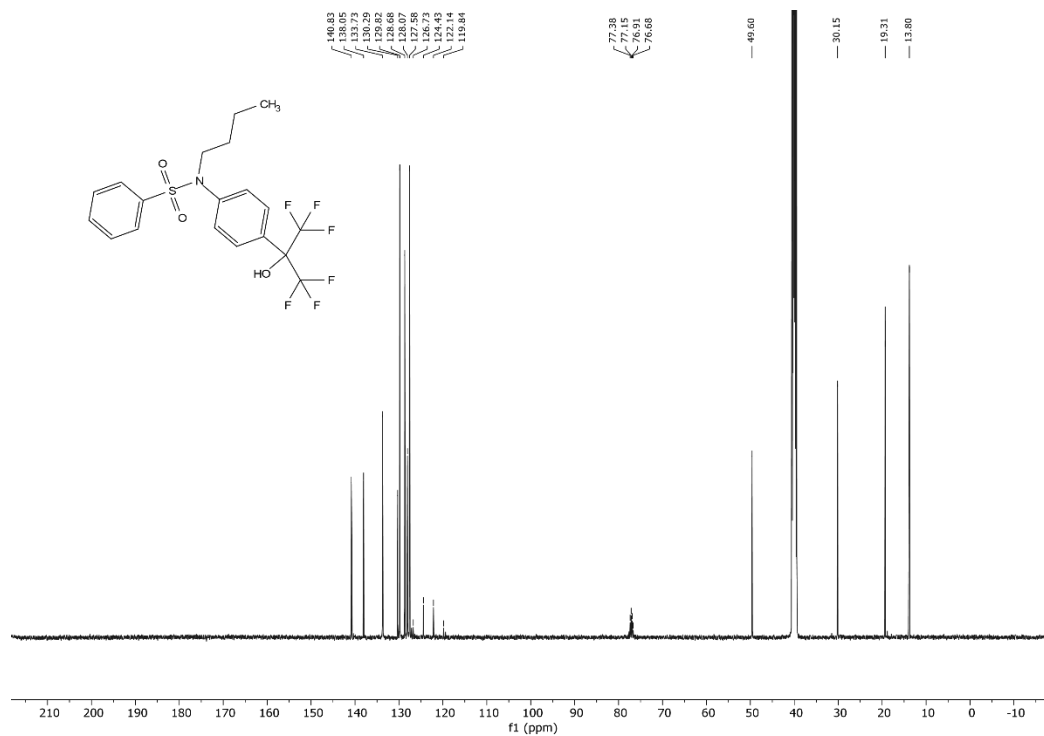

Figure S6. <sup>13</sup>C NMR of SJPYT-302.

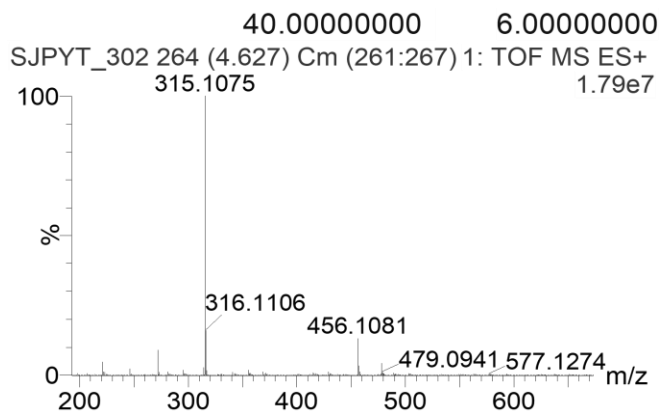

**Figure S7. HRMS of SJPYT-302.**

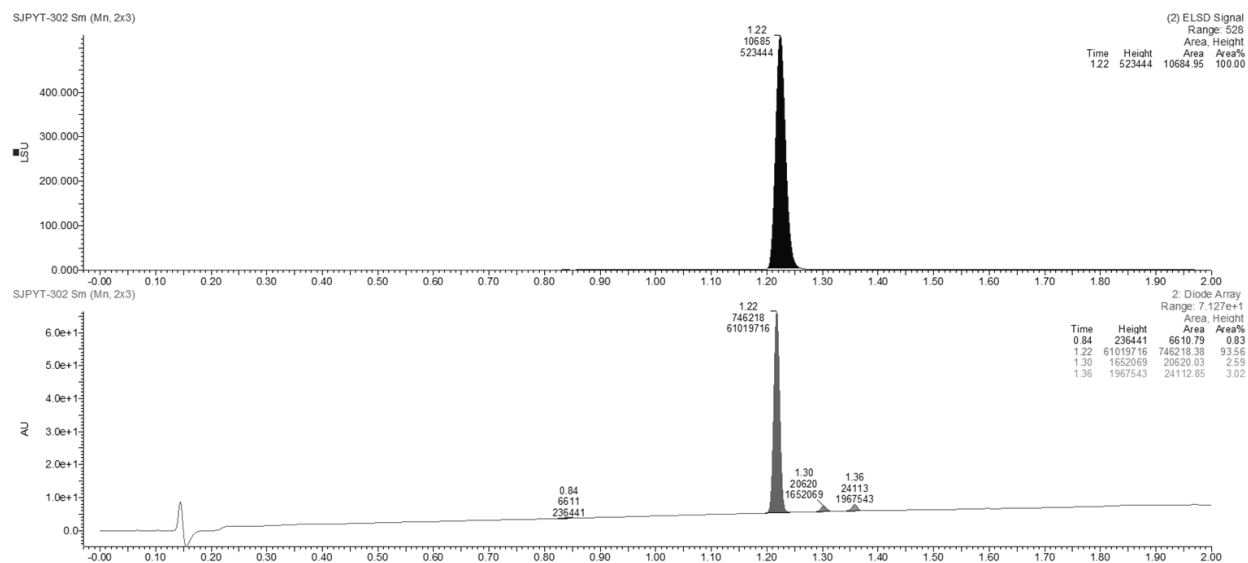

**Figure S8. HPLC of SJPYT-302.**

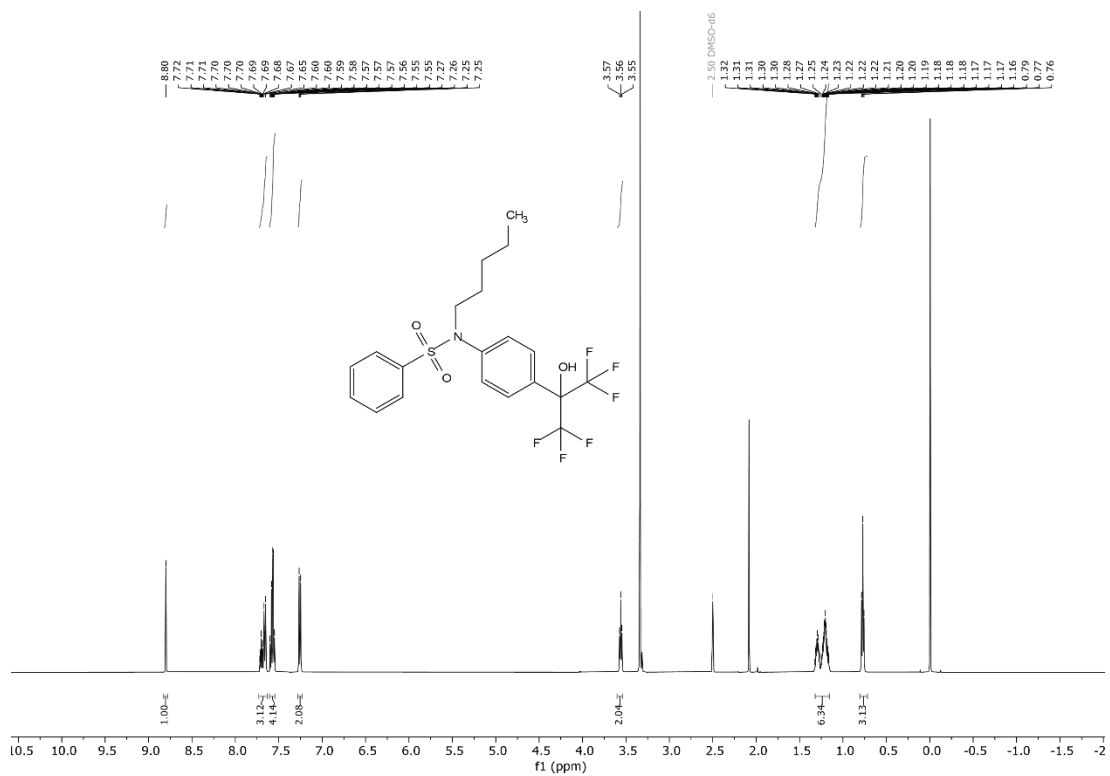

Figure S9. <sup>1</sup>H NMR of SJPYT-315.

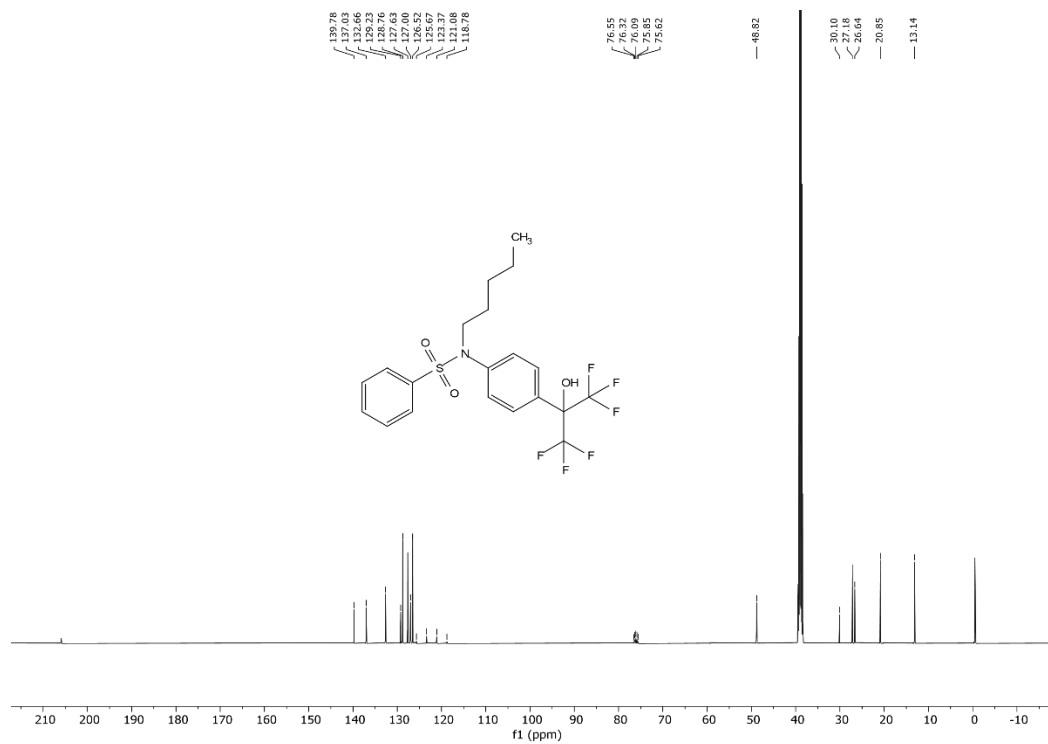

Figure S10. <sup>13</sup>C NMR of SJPYT-315.

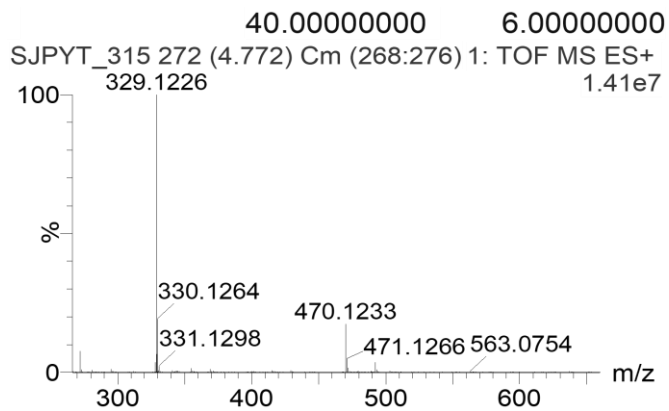

**Figure S11. HRMS of SJPYT-315.**

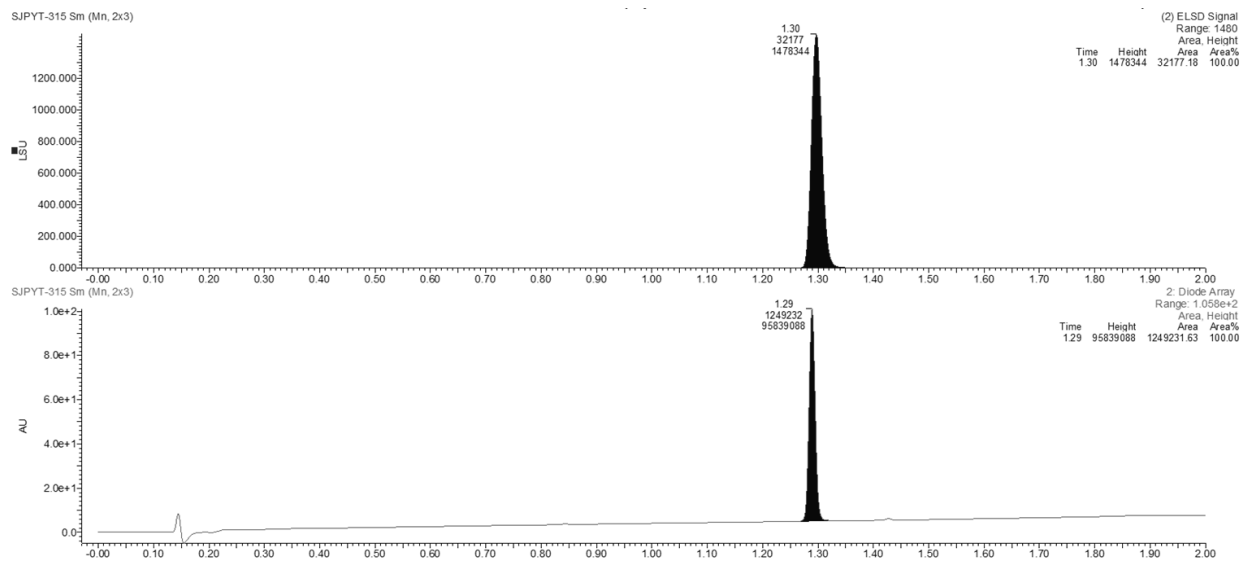

**Figure S12. HPLC of SJPYT-315.**

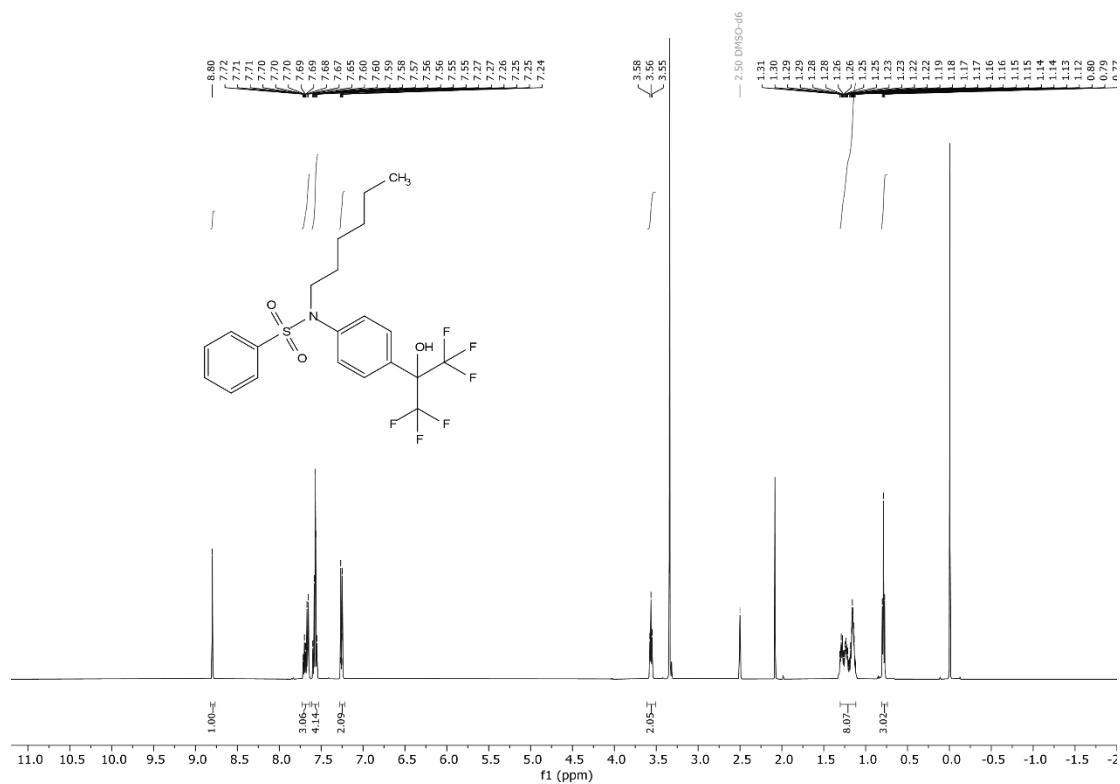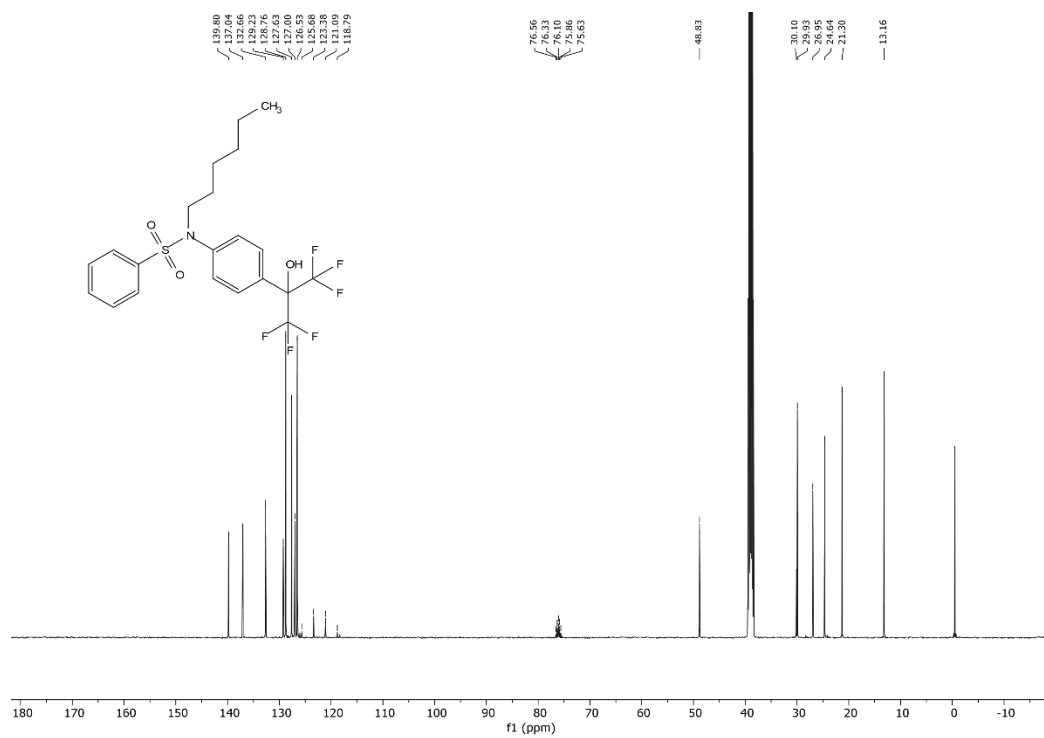

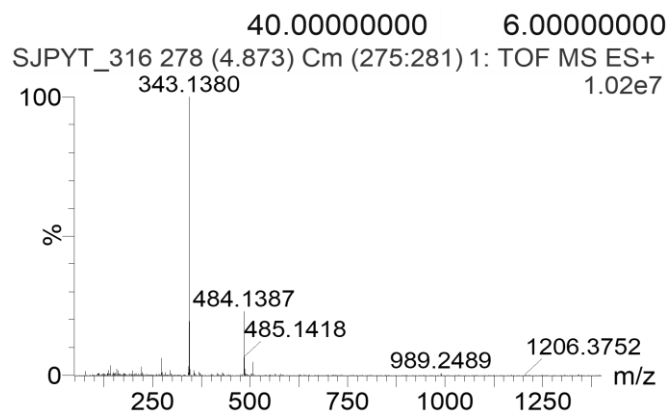

Figure S15. HRMS of SJPYT-316.

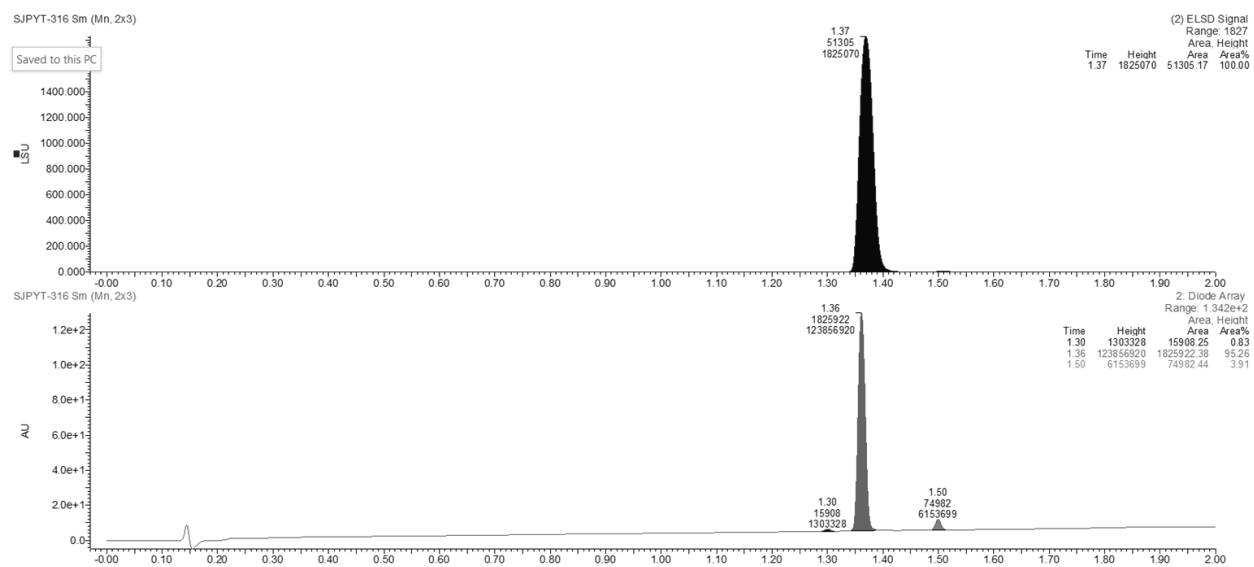

Figure S16. HPLC of SJPYT-316.





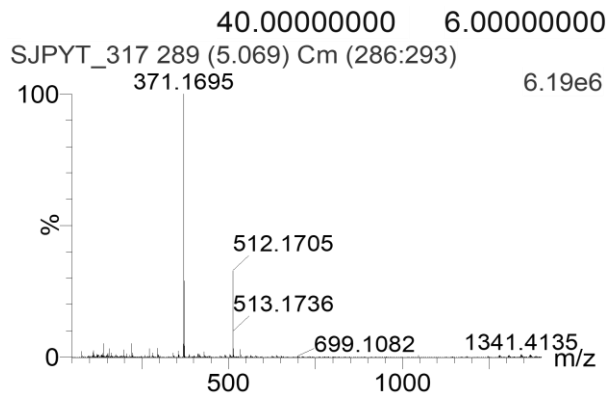

Figure S19. HRMS of SJPYT-317.

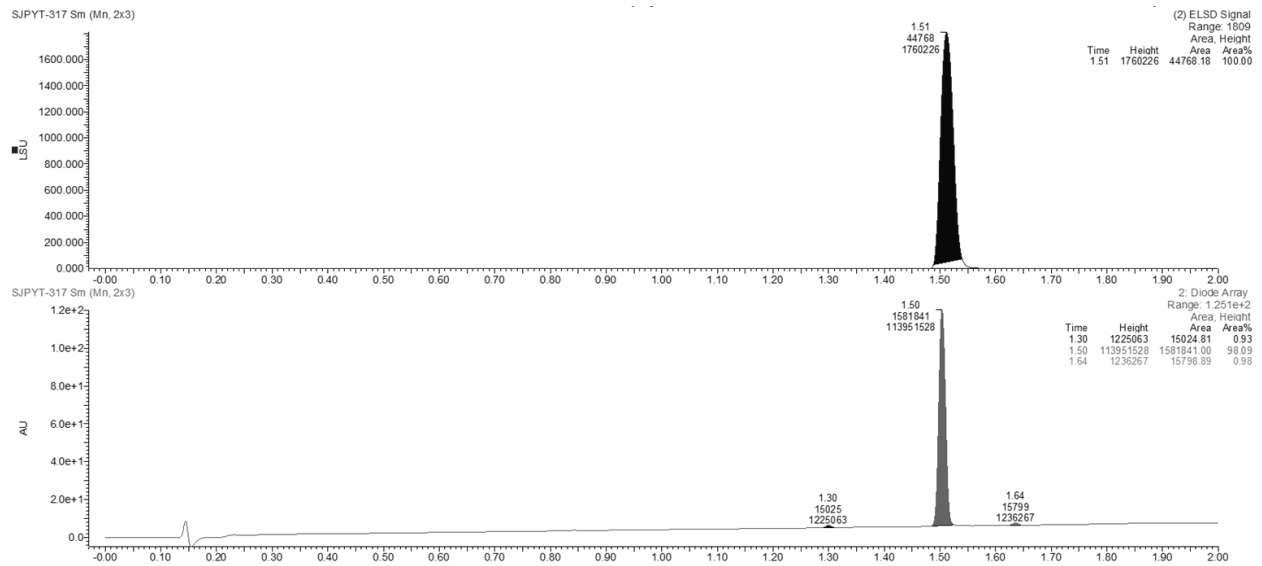

Figure S20. HPLC of SJPYT-317.

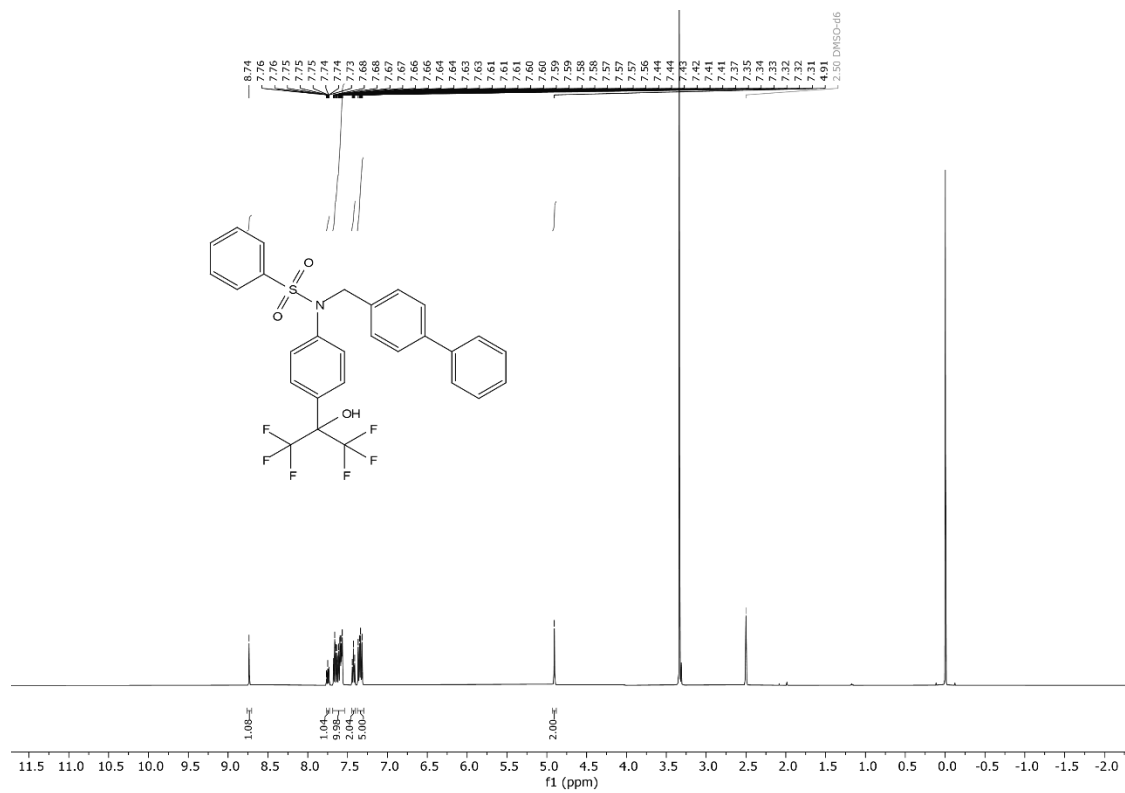

Figure S21. <sup>1</sup>H NMR of SJPYT-319.

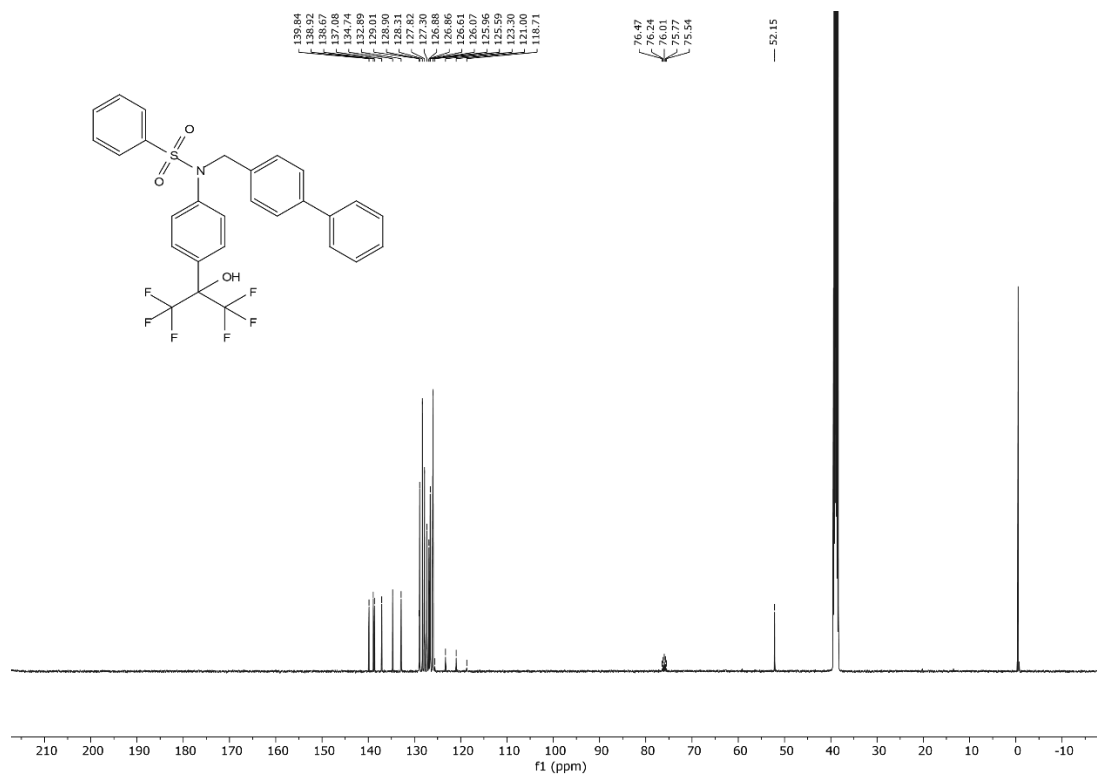

Figure S22. <sup>13</sup>C NMR of SJPYT-319.

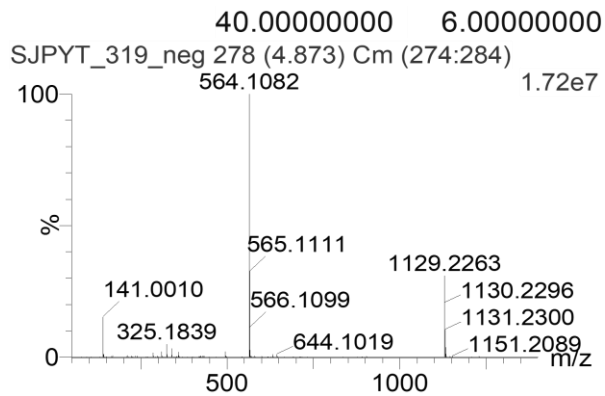

Figure S23. HRMS of SJPYT-319.

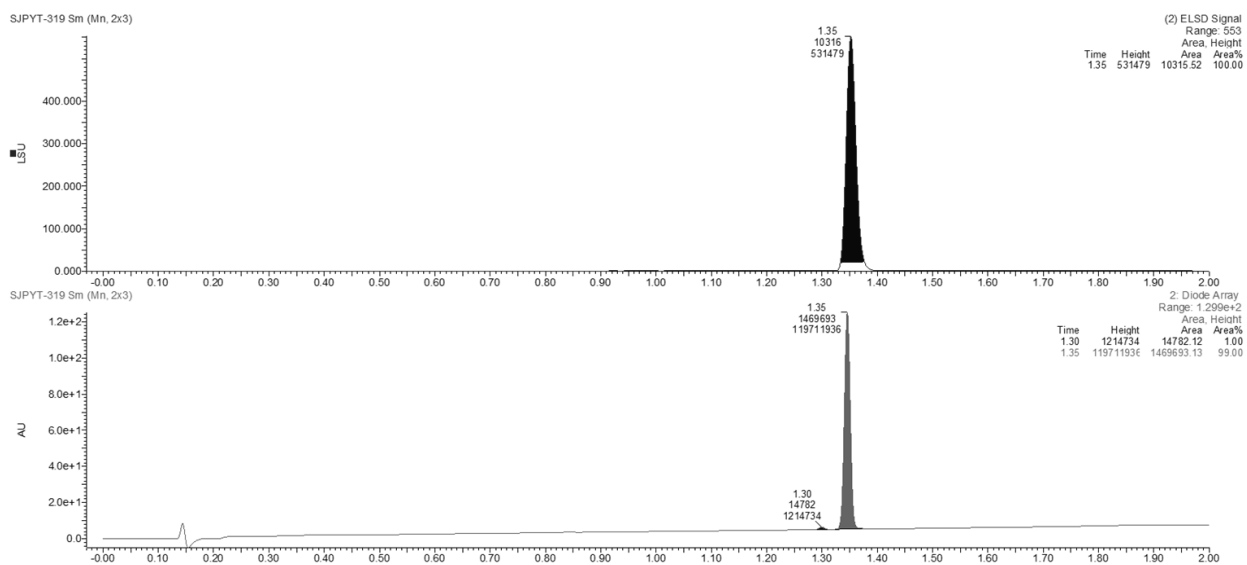

Figure S24. HPLC of SJPYT-319.

## SI References

1. B. P. Fauber *et al.*, Structure-based design of substituted hexafluoroisopropanol-arylsulfonamides as modulators of RORc. *Bioorg Med Chem Lett* **23**, 6604-6609 (2013).
